# Supplementary material for: Translatome and transcriptome analysis of TMA20 (MCT-1) and TMA64 (eIF2D) knockout yeast strains
Source: PubMed Central journal article supplement (PMC6378902; doi:10.1016/j.dib.2019.103701), 2019-02-02
Supplement: mmc3.pdf [file mmc3.pdf]

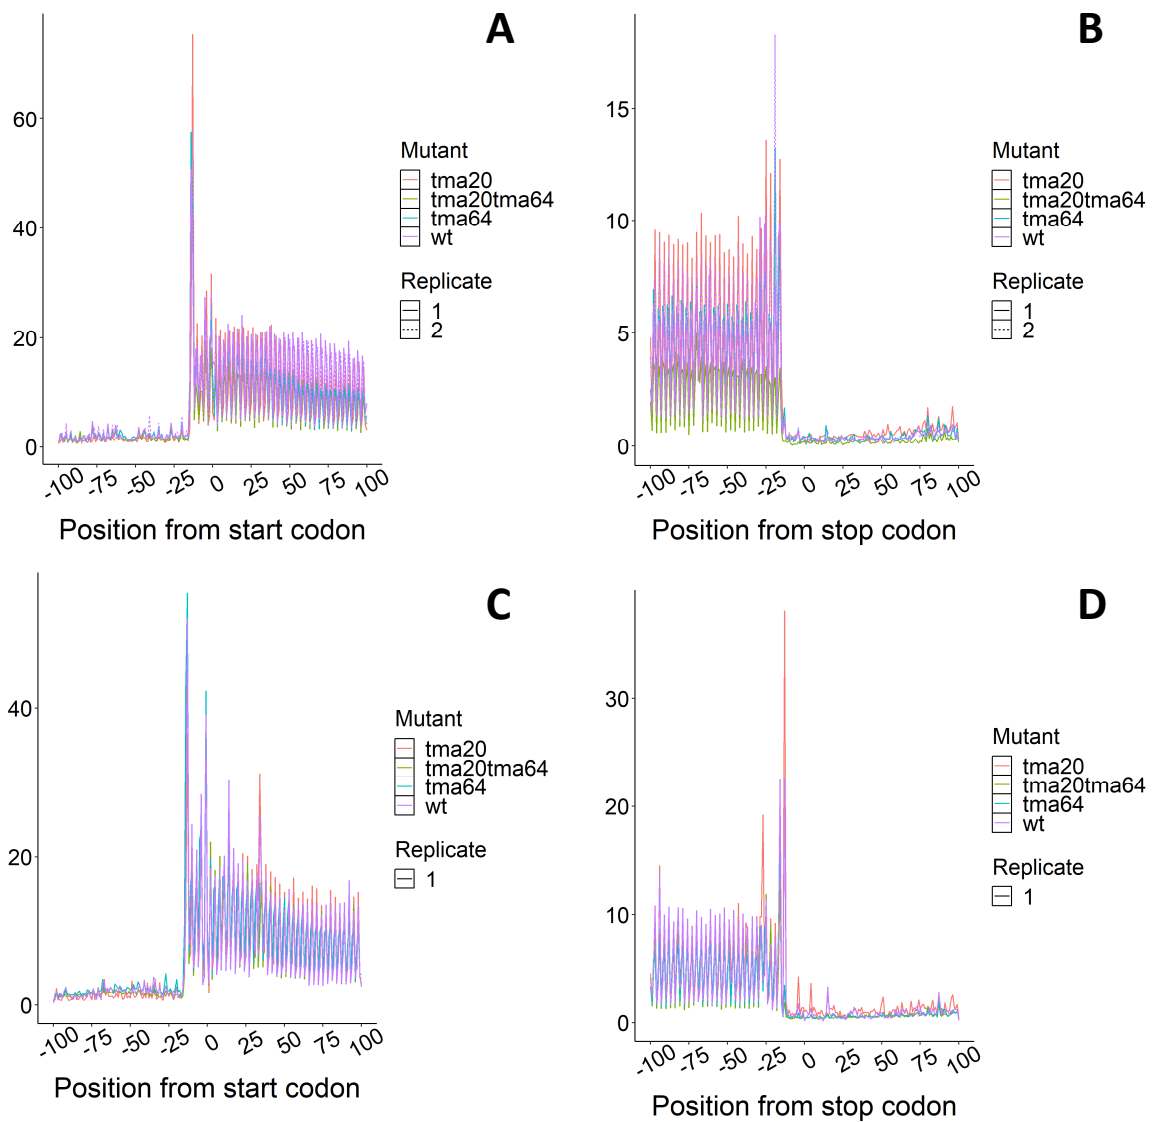

**Fig. S1.** Metagene profiles demonstrating aggregated coverage with 5' ends of Ribo-Seq footprints in windows centered at start-codon (A, C) and stop-codon (B, D). Panels A and B: Ribo-Seq data of yeast strains maintained in YPD medium, panels C and D: Ribo-Seq data of yeast strains maintained in SD medium. X axis: relative location; Y axis: the coverage aggregated for all genes; for each gene, the values were normalized to the (total gene coverage / gene length).
